# Supplementary material for: Association of Primary Care Clinic Appointment Time With Clinician Ordering and Patient Completion of Breast and Colorectal Cancer Screening
Source: PubMed Central journal article supplement (PMC6512279; doi:10.1001/jamanetworkopen.2019.3403), 2019-05-10

## Supplementary Online Content

Hsiang EY, Mehta SJ, Small DS, et al. Association of primary care clinic appointment time with clinician ordering and patient completion of breast and colorectal cancer screening. *JAMA Netw Open*. 2019;2(5):e193403. doi:10.1001/jamanetworkopen.2019.3403

**eTable 1.** Practice Site Location and Specialty

**eTable 2.** Electronic Health Record Codes Used to Classify Screening Tests

**eTable 3.** Sample Characteristics of Patients Visiting With Their Primary Care Physician and Eligible for Breast Cancer Screening by Hour

**eTable 4.** Sample Characteristics of Patients Visiting With Their Primary Care Physician and Eligible for Colorectal Cancer Screening by Hour

**eTable 5.** Distribution of Colorectal Cancer Screening Tests Across Different Times of Day

**eTable 6.** Regression Table for Conditional Logistic Clinic Appointment Time Model With Hourly Appointment Time Variables for Breast Cancer Screening

**eTable 7.** Regression Table for Conditional Logistic Clinic Appointment Time Model With Continuous Appointment Time Variables for Breast Cancer Screening

**eTable 8.** Regression Table for Conditional Logistic Clinic Appointment Time Model With Hourly Appointment Time Variables for Colorectal Cancer Screening

**eTable 9.** Regression Table for Conditional Logistic Clinic Appointment Time Model With Continuous Appointment Time Variables for Colorectal Cancer Screening

**eTable 10.** Regression Table for Generalized Estimated Equations Model Clustered on Primary Care Physician With Hourly Appointment Time Variables for Breast Cancer Screening

**eTable 11.** Regression Table for Generalized Estimated Equations Model Clustered on Primary Care Physician With Continuous Appointment Time Variables for Breast Cancer Screening

**eTable 12.** Regression Table for Generalized Estimated Equations Model Clustered Around Primary Care Physician With Hourly Appointment Time Variables for Colorectal Cancer Screening

**eTable 13.** Regression Table for Generalized Estimated Equations Model Clustered Around Primary Care Physician With Continuous Appointment Time Variables for Colorectal Cancer Screening

**eFigure 1.** Exclusions for the Patient Sample in Breast Cancer Screening

**eFigure 2.** Exclusions for the Patient Sample in Colorectal Cancer Screening

This supplementary material has been provided by the authors to give readers additional information about their work.

**eTable 1.** Practice Site Location and Specialty

| <b>Practice Name</b>                                           | <b>Location</b>      | <b>Specialty</b>  |
|----------------------------------------------------------------|----------------------|-------------------|
| Penn Family Medicine Southern Chester County                   | West Grove, PA       | Family Medicine   |
| Penn Family Medicine West Chester                              | West Chester, PA     | Family Medicine   |
| Penn Family Medicine Phoenixville                              | Phoenixville, PA     | Family Medicine   |
| Penn Family Care                                               | Philadelphia, PA     | Family Medicine   |
| Penn Family Medicine Chestnut Hill                             | Philadelphia, PA     | Family Medicine   |
| Penn Family Medicine University City                           | Philadelphia, PA     | Family Medicine   |
| Penn Family Medicine Limerick                                  | Limerick, PA         | Family Medicine   |
| Penn Family Medicine Kennett                                   | Kennett Square, PA   | Family Medicine   |
| Penn Family Medicine New Garden                                | Kennett Square, PA   | Family Medicine   |
| Penn Family Medicine Unionville                                | Kennett Square, PA   | Family Medicine   |
| Penn Family Medicine Gibbsboro                                 | Gibbsboro, NJ        | Family Medicine   |
| Penn Primary Care and Integrative Medicine Whiteland           | Exton, PA            | Family Medicine   |
| Penn Family Medicine Valley Forge                              | Berwyn, PA           | Family Medicine   |
| Penn Medicine Woodbury Heights                                 | Woodbury Heights, NJ | Internal Medicine |
| Penn Internal Medicine East Marshall Street                    | West Chester, PA     | Internal Medicine |
| Penn Radnor Internal Medicine                                  | Radnor, PA           | Internal Medicine |
| Penn Radnor Internal Medicine Geriatrics                       | Radnor, PA           | Internal Medicine |
| Penn General Internal Medicine Perelman                        | Philadelphia, PA     | Internal Medicine |
| Delancey Medicine Associates                                   | Philadelphia, PA     | Internal Medicine |
| Penn Center for Primary Care, Penn Presbyterian Medical Center | Philadelphia, PA     | Internal Medicine |
| Penn Internal Medicine - J. Edwin Wood Clinic                  | Philadelphia, PA     | Internal Medicine |
| Penn Internal Medicine Mayfair                                 | Philadelphia, PA     | Internal Medicine |
| Penn Internal Medicine University City                         | Philadelphia, PA     | Internal Medicine |

|                                                               |                    |                                    |
|---------------------------------------------------------------|--------------------|------------------------------------|
| Penn Internal Medicine – Michael Cirigliano Internal Medicine | Philadelphia, PA   | Internal Medicine                  |
| Penn Presbyterian Internal Medicine                           | Philadelphia, PA   | Internal Medicine                  |
| Penn Spruce Internal Medicine                                 | Philadelphia, PA   | Internal Medicine                  |
| Penn Internal Medicine Media                                  | Media, PA          | Internal Medicine                  |
| Penn Family and Internal Medicine Lincoln                     | West Chester, PA   | Internal Medicine, Family Medicine |
| Penn Family and Internal Medicine Longwood                    | Kennett Square, PA | Internal Medicine, Family Medicine |
| Penn Family and Internal Medicine Cherry Hill                 | Cherry Hill, NJ    | Internal Medicine, Family Medicine |
| Penn Medicine Bucks County                                    | Yardley, PA        | Internal Medicine, Family Medicine |
| Penn Medicine Rittenhouse                                     | Philadelphia, PA   | Internal Medicine, Family Medicine |
| Penn Medicine Bala Cynwyd                                     | Bala Cynwyd, PA    | Internal Medicine, Family Medicine |

**eTable 2.** Electronic Health Record Codes Used to Classify Screening Tests

| <b>Cancer Screening</b>     | <b>Test</b>                  | <b>Codes</b>                                                                                                                                                                                                                                                                                                                                                                                          |
|-----------------------------|------------------------------|-------------------------------------------------------------------------------------------------------------------------------------------------------------------------------------------------------------------------------------------------------------------------------------------------------------------------------------------------------------------------------------------------------|
| Breast Cancer Screening     | Mammogram                    | 87.36, 87.37, 77055, 77056, 77057, 77065, 77066, 77067, 111224, 111229, CADS, G0202, G0204, G0206, IMGAM0001, IMGAM0010, IMGAM0012, IMGAM0016, IMGAM0015, IMGAM0018, IMGAM0021, IMGAM0023, IMGAM0035, IMGAM0027, IMGAM0037, IMGAM0041, IMGAM0082, MABD, MABDBU, MABDT, MALD, MALDT, MAMB, MAMS, MARD, MARDBU, MARDT, MASD, MASDBU, MASDT, MAUD, RADHX0328, RADHX1242, RADHX1266, IMGAM0087, IMGAM0089 |
| Colorectal Cancer Screening | Colonoscopy                  | 45.22, 45.23, 45.25, 45.42, 45.43, 44388, 9053, 44389, 44390, 44391, 44392, 44394, 44393, 44397, 45355, 45378, 45379, 45380, 45381, 45383, 45382, 45385, 45384, 45386, 45387, 45391, 45392, 111227, G0105, G0121, GI10, 0528F, 3000004, 44403, 44404, 45390                                                                                                                                           |
|                             | FIT / FOBT                   | 35301, 82270, 82274, 83520, 111239, C6000980, FIT, G0328, OCCBI                                                                                                                                                                                                                                                                                                                                       |
|                             | Multitargeted Stool DNA Test | 111239, PROC7007                                                                                                                                                                                                                                                                                                                                                                                      |
|                             | Sigmoidoscopy                | 45.24, 45330, 45331, 45333, 45334, 45335, 45332, 45337, 45338, 45339, 45340, 45341, 45342, 45345, G0104, 3000006, 45300, 45305, 45315, 45317, 45346, GI12                                                                                                                                                                                                                                             |

**eTable 3.** Sample Characteristics of Patients Visiting With Their Primary Care Physician and Eligible for Breast Cancer Screening by Hour

| Characteristic          | Overall      | 8AM         | 9AM         | 10AM        | 11AM        | 12PM       | 1PM         | 2PM         | 3PM         | 4PM        | 5PM        |
|-------------------------|--------------|-------------|-------------|-------------|-------------|------------|-------------|-------------|-------------|------------|------------|
| Patients, No.           | 19254        | 2267        | 3081        | 2938        | 2062        | 585        | 2200        | 2646        | 2084        | 1025       | 366        |
| Age, Mean (SD), y       | 60.2 (6.9)   | 59.6 (6.7)  | 60.1 (6.8)  | 60.9 (7.1)  | 60.7 (7.1)  | 61 (7)     | 60.6 (7)    | 60.4 (6.9)  | 59.4 (6.7)  | 58.8 (6.3) | 58.3 (6.2) |
| Female, No. (%)         |              | -           | -           | -           | -           | -          | -           | -           | -           | -          | -          |
| Race/Ethnicity, No. (%) |              |             |             |             |             |            |             |             |             |            |            |
| White Non-hispanic      | 11682 (60.7) | 1475 (65.1) | 1809 (58.7) | 1758 (59.8) | 1278 (62)   | 377 (64.4) | 1304 (59.3) | 1577 (59.6) | 1198 (57.5) | 663 (64.7) | 243 (66.4) |
| Black Non-hispanic      | 5495 (28.5)  | 62 (2.7)    | 137 (4.4)   | 79 (2.7)    | 49 (2.4)    | 18 (3.1)   | 62 (2.8)    | 60 (2.3)    | 59 (2.8)    | 26 (2.5)   | 11 (3.0)   |
| Asian                   | 563 (2.9)    | 544 (24)    | 862 (28.0)  | 893 (30.4)  | 579 (28.1)  | 140 (23.9) | 640 (29.1)  | 814 (30.8)  | 668 (32.1)  | 267 (26.0) | 88 (24.0)  |
| Hispanic                | 434 (2.3)    | 64 (2.8)    | 71 (2.3)    | 64 (2.2)    | 32 (1.6)    | 4 (0.7)    | 66 (3.0)    | 66 (2.5)    | 41 (2.0)    | 17 (1.7)   | 9 (2.5)    |
| Other/Unknown           | 1080 (5.6)   | 122 (5.4)   | 202 (6.6)   | 144 (4.9)   | 124 (6.0)   | 46 (7.9)   | 128 (5.8)   | 129 (4.9)   | 118 (5.7)   | 52 (5.1)   | 15 (4.1)   |
| Insurance, No. (%)      |              |             |             |             |             |            |             |             |             |            |            |
| Private                 | 12392 (64.4) | 1696 (74.8) | 2009 (65.2) | 1709 (58.2) | 1217 (59.0) | 374 (63.9) | 1302 (59.2) | 1592 (60.2) | 1403 (67.3) | 781 (76.2) | 309 (84.4) |
| Medicare                | 5527 (28.7)  | 483 (21.3)  | 855 (27.8)  | 1001 (34.1) | 690 (33.5)  | 194 (33.2) | 733 (33.3)  | 831 (31.4)  | 515 (24.7)  | 181 (17.7) | 44 (12.0)  |
| Medicaid                | 1335 (6.9)   | 88 (3.9)    | 217 (7.0)   | 228 (7.8)   | 155 (7.5)   | 17 (2.9)   | 165 (7.5)   | 223 (8.4)   | 166 (8.0)   | 63 (6.1)   | 13 (3.6)   |

|                                          |                |                |                |                |                |               |                |                |                |               |               |
|------------------------------------------|----------------|----------------|----------------|----------------|----------------|---------------|----------------|----------------|----------------|---------------|---------------|
| Annual Household Income, No. (%)*        |                |                |                |                |                |               |                |                |                |               |               |
| <\$50,000                                | 6228<br>(32.3) | 588<br>(25.9)  | 1017<br>(33)   | 972<br>(33.1)  | 638<br>(30.9)  | 169<br>(28.9) | 709<br>(32.2)  | 959<br>(36.2)  | 771<br>(37.0)  | 305<br>(29.8) | 100<br>(27.3) |
| \$50,000 to \$100,000                    | 9873<br>(51.3) | 1278<br>(56.4) | 1557<br>(50.5) | 1498<br>(51.0) | 1043<br>(50.6) | 294<br>(50.3) | 1118<br>(50.8) | 1300<br>(49.1) | 1004<br>(48.2) | 554<br>(54.0) | 227<br>(62.0) |
| >\$100,000                               | 2933<br>(15.2) | 367<br>(16.2)  | 473<br>(15.4)  | 431<br>(14.7)  | 366<br>(17.7)  | 115<br>(19.7) | 343<br>(15.6)  | 354<br>(13.4)  | 285<br>(13.7)  | 162<br>(15.8) | 37<br>(10.1)  |
| Missing                                  | 220 (1.1)      | 34 (1.5)       | 34 (1.1)       | 37 (1.3)       | 15 (0.7)       | 7 (1.2)       | 30<br>(1.4)    | 33<br>(1.2)    | 24<br>(1.2)    | 4 (0.4)       | 2 (0.5)       |
| Charlson Comorbidity Index, Median (IQR) | 0 (0-1)        | 0 (0-1)        | 0 (0-1)        | 0 (0-2)        | 0 (0-2)        | 0 (0-1)       | 0 (0-1)        | 0 (0-1)        | 0 (0-1)        | 0 (0-1)       | 0 (0-1)       |

Abbreviations: SD, standard deviation. IQR, interquartile range.

\*Annual household income was linked to each patient using the US Census data on median household income based on zip code.

**eTable 4.** Sample Characteristics of Patients Visiting With Their Primary Care Physician and Eligible for Colorectal Cancer Screening by Hour

| Characteristic          | Overall      | 8AM         | 9AM         | 10AM        | 11AM        | 12PM       | 1PM         | 2PM         | 3PM         | 4PM         | 5PM        |
|-------------------------|--------------|-------------|-------------|-------------|-------------|------------|-------------|-------------|-------------|-------------|------------|
| Patients, No.           | 33468        | 4293        | 5183        | 5125        | 3427        | 951        | 3736        | 4429        | 3732        | 1900        | 692        |
| Age, Mean (SD), y       | 59.6 (7.4)   | 58.8 (7.2)  | 59.6 (7.4)  | 60.4 (7.5)  | 60.2 (7.6)  | 60.7 (7.6) | 60 (7.5)    | 59.7 (7.3)  | 59 (7.1)    | 58.1 (6.8)  | 57.3 (6.2) |
| Female, No. (%)         | 14796 (44.2) | 2178 (50.7) | 2315 (44.7) | 2185 (42.6) | 1393 (40.6) | 347 (36.5) | 1618 (43.3) | 1843 (41.6) | 1697 (45.5) | 905 (47.6)  | 315 (45.5) |
| Race/Ethnicity, No. (%) |              |             |             |             |             |            |             |             |             |             |            |
| White Non-hispanic      | 22157 (66.2) | 3133 (73.0) | 3439 (66.4) | 3307 (64.5) | 2295 (67.0) | 677 (71.2) | 2363 (63.2) | 2748 (62.0) | 2377 (63.7) | 1324 (69.7) | 494 (71.4) |
| Black Non-hispanic      | 7296 (21.8)  | 104 (2.4)   | 196 (3.8)   | 145 (2.8)   | 75 (2.2)    | 23 (2.4)   | 103 (2.8)   | 125 (2.8)   | 126 (3.4)   | 53 (2.8)    | 17 (2.5)   |
| Asian                   | 967 (2.9)    | 686 (16.0)  | 1077 (20.8) | 1216 (23.7) | 755 (22.0)  | 184 (19.3) | 906 (24.3)  | 1121 (25.3) | 875 (23.4)  | 358 (18.8)  | 118 (17.1) |
| Hispanic                | 965 (2.9)    | 134 (3.1)   | 158 (3.0)   | 158 (3.1)   | 79 (2.3)    | 6 (0.6)    | 128 (3.4)   | 143 (3.2)   | 96 (2.6)    | 50 (2.6)    | 13 (1.9)   |
| Other/Unknown           | 2083 (6.2)   | 236 (5.5)   | 313 (6.0)   | 299 (5.8)   | 223 (6.5)   | 61 (6.4)   | 236 (6.3)   | 292 (6.6)   | 258 (6.9)   | 115 (6.1)   | 50 (7.2)   |
| Insurance, No. (%)      |              |             |             |             |             |            |             |             |             |             |            |
| Private                 | 22288 (66.6) | 3277 (76.3) | 3445 (66.5) | 3089 (60.3) | 2117 (61.8) | 629 (66.1) | 2280 (61.0) | 2768 (62.5) | 2587 (69.3) | 1508 (79.4) | 588 (85.0) |
| Medicare                | 9003 (26.9)  | 865 (20.1)  | 1415 (27.3) | 1671 (32.6) | 1084 (31.6) | 287 (30.2) | 1167 (31.2) | 1280 (28.9) | 859 (23.0)  | 300 (15.8)  | 75 (10.8)  |
| Medicaid                | 2177 (6.5)   | 151 (3.5)   | 323 (6.2)   | 365 (7.1)   | 226 (6.6)   | 35 (3.7)   | 289 (7.7)   | 381 (8.6)   | 286 (7.7)   | 92 (4.8)    | 29 (4.2)   |



|                                          |                 |                |                |                |                |               |                |                |                |               |               |
|------------------------------------------|-----------------|----------------|----------------|----------------|----------------|---------------|----------------|----------------|----------------|---------------|---------------|
| Annual Household Income, No. (%)*        |                 |                |                |                |                |               |                |                |                |               |               |
| <\$50,000                                | 8865<br>(26.5)  | 801<br>(18.7)  | 1395<br>(26.9) | 1382<br>(27)   | 933<br>(27.2)  | 254<br>(26.7) | 1108<br>(29.7) | 1361<br>(30.7) | 1065<br>(28.5) | 423<br>(22.3) | 143<br>(20.7) |
| \$50,000 to \$100,000                    | 18551<br>(55.4) | 2639<br>(61.5) | 2781<br>(53.7) | 2891<br>(56.4) | 1801<br>(52.6) | 507<br>(53.3) | 1994<br>(53.4) | 2337<br>(52.8) | 2039<br>(54.6) | 1121 (59)     | 441<br>(63.7) |
| >\$100,000                               | 5622<br>(16.8)  | 807<br>(18.8)  | 944<br>(18.2)  | 772<br>(15.1)  | 663<br>(19.3)  | 176<br>(18.5) | 576<br>(15.4)  | 664<br>(15.0)  | 578 (15.5)     | 344<br>(18.1) | 98<br>(14.2)  |
| Missing                                  | 430<br>(1.3)    | 46<br>(1.1)    | 63<br>(1.2)    | 80 (1.6)       | 30 (0.9)       | 14 (1.5)      | 58 (1.6)       | 67 (1.5)       | 50 (1.3)       | 12 (0.6)      | 10 (1.4)      |
| Charlson Comorbidity Index, Median (IQR) | 0 (0-1)         | 0 (0-1)        | 0 (0-1)        | 0 (0-2)        | 0 (0-2)        | 0 (0-2)       | 0 (0-1)        | 0 (0-1)        | 0 (0-1)        | 0 (0-1)       | 0 (0-1)       |

Abbreviations: SD, standard deviation. IQR, interquartile range.

\*Annual household income was linked to each patient using the US Census data on median household income based on zip code.

**eTable 5.** Distribution of Colorectal Cancer Screening Tests Across Different Times of Day

| <b>All Visits</b>                      |                    |                      |            |             |                                     |
|----------------------------------------|--------------------|----------------------|------------|-------------|-------------------------------------|
|                                        | <b>Colonoscopy</b> | <b>Sigmoidoscopy</b> | <b>FIT</b> | <b>FOBT</b> | <b>Multitargeted Stool DNA Test</b> |
| Test Type, No. (%)                     | 7760 (90.9)        | 23 (0.3)             | 248 (2.9)  | 500 (5.9)   | 10 (0.1)                            |
| <b>All Visits from 8 AM to 5:59 PM</b> |                    |                      |            |             |                                     |
|                                        | <b>Colonoscopy</b> | <b>Sigmoidoscopy</b> | <b>FIT</b> | <b>FOBT</b> | <b>Multitargeted Stool DNA Test</b> |
| Test Type, No. (%)                     | 7468 (90.7)        | 23 (0.3)             | 241 (2.9)  | 493 (6)     | 10 (0.1)                            |
| 8AM                                    | 1096 (91)          | 1 (0.1)              | 38 (3.2)   | 67 (5.6)    | 2 (0.2)                             |
| 9AM                                    | 1206 (90.2)        | 5 (0.4)              | 47 (3.5)   | 78 (5.8)    | 1 (0.1)                             |
| 10AM                                   | 1175 (90.6)        | 3 (0.2)              | 40 (3.1)   | 78 (6)      | 1 (0.1)                             |
| 11AM                                   | 722 (89.4)         | 3 (0.4)              | 17 (2.1)   | 66 (8.2)    | 0 (0)                               |
| 12PM                                   | 225 (92.6)         | 0 (0)                | 5 (2.1)    | 13 (5.3)    | 0 (0)                               |
| 1PM                                    | 740 (89.2)         | 4 (0.5)              | 23 (2.8)   | 61 (7.3)    | 2 (0.2)                             |
| 2PM                                    | 910 (89.7)         | 6 (0.6)              | 32 (3.2)   | 65 (6.4)    | 1 (0.1)                             |
| 3PM                                    | 865 (92.5)         | 0 (0)                | 29 (3.1)   | 39 (4.2)    | 2 (0.2)                             |
| 4PM                                    | 416 (93.7)         | 1 (0.2)              | 7 (1.6)    | 19 (4.3)    | 1 (0.2)                             |
| 5PM                                    | 113 (91.9)         | 0 (0)                | 3 (2.4)    | 7 (5.7)     | 0 (0)                               |

**eTable 6.** Regression Table for Conditional Logistic Clinic Appointment Time Model With Hourly Appointment Time Variables for Breast Cancer Screening

| Variable                                                       | Clinician Ordered Test |         | Patient Completed Test |         |
|----------------------------------------------------------------|------------------------|---------|------------------------|---------|
|                                                                | Odds Ratio             | P value | Odds Ratio             | P value |
| Appointment year                                               |                        |         |                        |         |
| 9/1/2014-8/31/2015                                             | Ref                    |         | Ref                    |         |
| 9/1/2015-8/31/2016                                             | 1.12                   | 0.0039  | 1.05                   | 0.2130  |
| Age at visit                                                   | 1.01                   | 0.0974  | 1.01                   | 0.0003  |
| Race                                                           |                        |         |                        |         |
| White                                                          | Ref                    |         | Ref                    |         |
| Asian/East Indian                                              | 1.15                   | 0.1545  | 1.27                   | 0.0109  |
| Black                                                          | 1.29                   | <.0001  | 1.20                   | 0.0003  |
| Hispanic                                                       | 1.79                   | <.0001  | 1.68                   | <.0001  |
| Other                                                          | 0.95                   | 0.4405  | 1.01                   | 0.9191  |
| Insurance                                                      |                        |         |                        |         |
| Private                                                        | Ref                    |         | Ref                    |         |
| Medicaid                                                       | 0.65                   | <.0001  | 0.84                   | 0.0160  |
| Medicare                                                       | 0.77                   | <.0001  | 0.89                   | 0.0214  |
| Charlson comorbidity index                                     | 0.89                   | <.0001  | 0.93                   | <.0001  |
| Income                                                         |                        |         |                        |         |
| Less than \$50,000                                             | Ref                    |         | Ref                    |         |
| \$50,000 to \$100,000                                          | 0.97                   | 0.6185  | 1.00                   | 0.9781  |
| Greater than \$100,000                                         | 0.92                   | 0.1982  | 1.04                   | 0.5501  |
| Missing                                                        | 0.65                   | 0.0059  | 0.79                   | 0.1683  |
| Practice site                                                  |                        |         |                        |         |
| Penn Internal Medicine - Michael Cirigliano Internal Medicine  | Ref                    |         | Ref                    |         |
| Penn Family Medicine Chestnut Hill                             | 1.00                   | .       | 1.00                   | .       |
| Delancey Medicine Associates                                   | 1.00                   | .       | 1.00                   | .       |
| Penn Family and Internal Medicine Lincoln                      | 1.00                   | .       | 1.00                   | .       |
| Penn Family Medicine Southern Chester County                   | 1.00                   | .       | 1.00                   | .       |
| Penn Internal Medicine University City                         | 1.60                   | 0.4582  | 3.84                   | 0.1000  |
| Penn General Internal Medicine Perelman                        | 1.00                   | .       | 1.00                   | .       |
| Penn Center for Primary Care, Penn Presbyterian Medical Center | 1.00                   | .       | 1.00                   | .       |
| Penn Radnor Internal Medicine                                  | 0.89                   | 0.5732  | 0.91                   | 0.6355  |

|                                                      |      |        |      |        |
|------------------------------------------------------|------|--------|------|--------|
| Penn Radnor Internal Medicine Geriatrics             | 1.00 | .      | 1.00 | .      |
| Penn Internal Medicine Media                         | 1.00 | .      | 1.00 | .      |
| Penn Internal Medicine Mayfair                       | 1.44 | 0.389  | 2.00 | 0.2204 |
| Penn Internal Medicine - J. Edwin Wood Clinic        | 1.00 | .      | 1.00 | .      |
| Penn Family Medicine Kennett                         | 1.00 | .      | 1.00 | .      |
| Penn Family Care                                     | 1.00 | .      | 1.00 | .      |
| Penn Family and Internal Medicine Longwood           | 1.00 | .      | 1.00 | .      |
| Penn Family Medicine New Garden                      | 1.00 | .      | 1.00 | .      |
| Penn Family Medicine Phoenixville                    | 1.00 | .      | 1.00 | .      |
| Penn Family Medicine Unionville                      | 2.15 | 0.3554 | 2.80 | 0.2896 |
| Penn Family and Internal Medicine Cherry Hill        | 1.00 | .      | 1.00 | .      |
| Penn Presbyterian Internal Medicine                  | 1.00 | .      | 1.00 | .      |
| Penn Internal Medicine East Marshall Street          | 1.00 | .      | 1.00 | .      |
| Penn Primary Care and Integrative Medicine Whiteland | 1.00 | .      | 1.00 | .      |
| Penn Medicine Rittenhouse                            | 1.00 | .      | 1.00 | .      |
| Penn Medicine Bala Cynwyd                            | 1.00 | .      | 1.00 | .      |
| Penn Medicine Woodbury Heights                       | 1.00 | .      | 1.00 | .      |
| Penn Family Medicine Valley Forge                    | 1.00 | .      | 1.00 | .      |
| Penn Medicine Bucks County                           | 1.00 | .      | 1.00 | .      |
| Penn Family Medicine Limerick                        | 1.00 | .      | 1.00 | .      |
| Penn Family Medicine Gibbsboro                       | 1.00 | .      | 1.00 | .      |
| Penn Spruce Internal Medicine                        | 1.00 | .      | 1.00 | .      |
| Penn Family Medicine University City                 | 1.00 | .      | 1.00 | .      |
| Penn Family Medicine West Chester                    | 1.00 | .      | 1.00 | .      |
| Clinic appointment time                              |      |        |      |        |
| 8AM                                                  | Ref  |        | Ref  |        |
| 9AM                                                  | 0.89 | 0.0617 | 0.91 | 0.1443 |
| 10AM                                                 | 0.73 | <.0001 | 0.81 | 0.0007 |
| 11AM                                                 | 0.55 | <.0001 | 0.64 | <.0001 |
| 12PM                                                 | 0.60 | <.0001 | 0.63 | <.0001 |
| 1PM                                                  | 0.64 | <.0001 | 0.73 | <.0001 |
| 2PM                                                  | 0.65 | <.0001 | 0.71 | <.0001 |
| 3PM                                                  | 0.68 | <.0001 | 0.78 | 0.0003 |
| 4PM                                                  | 0.49 | <.0001 | 0.60 | <.0001 |
| 5PM                                                  | 0.53 | <.0001 | 0.49 | <.0001 |
| Month                                                |      |        |      |        |

|                      |      |        |      |        |
|----------------------|------|--------|------|--------|
| September            | Ref  |        | Ref  |        |
| January              | 1.17 | 0.0319 | 1.04 | 0.6341 |
| February             | 1.30 | 0.0005 | 1.00 | 0.9932 |
| March                | 1.41 | <.0001 | 1.08 | 0.3130 |
| April                | 1.31 | 0.0004 | 0.97 | 0.6733 |
| May                  | 1.34 | 0.0004 | 0.92 | 0.3305 |
| June                 | 1.28 | 0.0018 | 1.05 | 0.5332 |
| July                 | 1.23 | 0.0136 | 0.86 | 0.0774 |
| August               | 1.31 | 0.0019 | 1.15 | 0.0948 |
| October              | 1.19 | 0.0044 | 1.19 | 0.0050 |
| November             | 1.20 | 0.0075 | 1.00 | 0.9541 |
| December             | 1.08 | 0.2874 | 0.94 | 0.4140 |
| Visit type           |      |        |      |        |
| Return patient visit | Ref  |        | Ref  |        |
| New patient visit    | 0.84 | <.0001 | 0.88 | 0.0048 |

**eTable 7.** Regression Table for Conditional Logistic Clinic Appointment Time Model With Continuous Appointment Time Variables for Breast Cancer Screening

| Variable                                                       | Clinician Ordered Test |                | Patient Completed Test |                |
|----------------------------------------------------------------|------------------------|----------------|------------------------|----------------|
|                                                                | Odds Ratio             | <i>P</i> value | Odds Ratio             | <i>P</i> value |
| Appointment year                                               |                        |                |                        |                |
| 9/1/2014-8/31/2015                                             | Ref                    |                | Ref                    |                |
| 9/1/2015-8/31/2016                                             | 1.13                   | 0.0033         | 1.06                   | 0.1840         |
| Age at visit                                                   | 1.00                   | 0.1110         | 1.01                   | 0.0004         |
| Race                                                           |                        |                |                        |                |
| White                                                          | Ref                    |                | Ref                    |                |
| Asian/East Indian                                              | 1.16                   | 0.1259         | 1.28                   | 0.0093         |
| Black                                                          | 1.28                   | <.0001         | 1.19                   | 0.0005         |
| Hispanic                                                       | 1.81                   | <.0001         | 1.69                   | <.0001         |
| Other                                                          | 0.95                   | 0.4932         | 1.01                   | 0.9257         |
| Insurance                                                      |                        |                |                        |                |
| Private                                                        | Ref                    |                | Ref                    |                |
| Medicaid                                                       | 0.64                   | <.0001         | .83                    | 0.0097         |
| Medicare                                                       | 0.76                   | <.0001         | .89                    | 0.0114         |
| Charlson comorbidity index                                     | 0.89                   | <.0001         | .93                    | <.0001         |
| Income                                                         |                        |                |                        |                |
| Less than \$50,000                                             | Ref                    |                | Ref                    |                |
| \$50,000 to \$100,000                                          | 0.97                   | 0.6139         | 1.00                   | 0.9473         |
| Greater than \$100,000                                         | 0.92                   | 0.1974         | 1.04                   | 0.5693         |
| Missing                                                        | 0.66                   | 0.0090         | .79                    | 0.1554         |
| Practice site                                                  |                        |                |                        |                |
| Penn Internal Medicine - Michael Cirigliano Internal Medicine  | Ref                    |                | Ref                    |                |
| Penn Family Medicine Chestnut Hill                             | 1.00                   | .              | 1.00                   | .              |
| Delancey Medicine Associates                                   | 1.00                   | .              | 1.00                   | .              |
| Penn Family and Internal Medicine Lincoln                      | 1.00                   | .              | 1.00                   | .              |
| Penn Family Medicine Southern Chester County                   | 1.00                   | .              | 1.00                   | .              |
| Penn Internal Medicine University City                         | 1.45                   | 0.5583         | 3.47                   | 0.1238         |
| Penn General Internal Medicine Perelman                        | 1.00                   | .              | 1.00                   | .              |
| Penn Center for Primary Care, Penn Presbyterian Medical Center | 1.00                   | .              | 1.00                   | .              |
| Penn Radnor Internal Medicine                                  | 0.86                   | 0.4943         | .91                    | 0.6606         |

|                                                      |      |        |      |        |
|------------------------------------------------------|------|--------|------|--------|
| Penn Radnor Internal Medicine Geriatrics             | 1.00 | .      | 1.00 | .      |
| Penn Internal Medicine Media                         | 1.00 | .      | 1.00 | .      |
| Penn Internal Medicine Mayfair                       | 1.49 | 0.3468 | 1.99 | 0.2193 |
| Penn Internal Medicine - J. Edwin Wood Clinic        | 1.00 | .      | 1.00 | .      |
| Penn Family Medicine Kennett                         | 1.00 | .      | 1.00 | .      |
| Penn Family Care                                     | 1.00 | .      | 1.00 | .      |
| Penn Family and Internal Medicine Longwood           | 1.00 | .      | 1.00 | .      |
| Penn Family Medicine New Garden                      | 1.00 | .      | 1.00 | .      |
| Penn Family Medicine Phoenixville                    | 1.00 | .      | 1.00 | .      |
| Penn Family Medicine Unionville                      | 1.99 | 0.4035 | 2.72 | 0.3035 |
| Penn Family and Internal Medicine Cherry Hill        | 1.00 | .      | 1.00 | .      |
| Penn Presbyterian Internal Medicine                  | 1.00 | .      | 1.00 | .      |
| Penn Internal Medicine East Marshall Street          | 1.00 | .      | 1.00 | .      |
| Penn Primary Care and Integrative Medicine Whiteland | 1.00 | .      | 1.00 | .      |
| Penn Medicine Rittenhouse                            | 1.00 | .      | 1.00 | .      |
| Penn Medicine Bala Cynwyd                            | 1.00 | .      | 1.00 | .      |
| Penn Medicine Woodbury Heights                       | 1.00 | .      | 1.00 | .      |
| Penn Family Medicine Valley Forge                    | 1.00 | .      | 1.00 | .      |
| Penn Medicine Bucks County                           | 1.00 | .      | 1.00 | .      |
| Penn Family Medicine Limerick                        | 1.00 | .      | 1.00 | .      |
| Penn Family Medicine Gibbsboro                       | 1.00 | .      | 1.00 | .      |
| Penn Spruce Internal Medicine                        | 1.00 | .      | 1.00 | .      |
| Penn Family Medicine University City                 | 1.00 | .      | 1.00 | .      |
| Penn Family Medicine West Chester                    | 1.00 | .      | 1.00 | .      |
| Appointment hour                                     | 0.94 | <.0001 | .95  | <.0001 |
| Month                                                |      |        |      |        |
| September                                            | Ref  |        | Ref  |        |
| January                                              | 1.17 | 0.0276 | 1.04 | 0.5963 |
| February                                             | 1.31 | 0.0003 | 1.01 | 0.9358 |
| March                                                | 1.42 | <.0001 | 1.09 | 0.2833 |
| April                                                | 1.33 | 0.0002 | .98  | 0.7528 |
| May                                                  | 1.35 | 0.0003 | .93  | 0.3875 |
| June                                                 | 1.30 | 0.0011 | 1.06 | 0.4754 |
| July                                                 | 1.24 | 0.0111 | .86  | 0.0871 |
| August                                               | 1.31 | 0.0014 | 1.16 | 0.0812 |
| October                                              | 1.20 | 0.0027 | 1.20 | 0.0034 |

|                      |      |        |      |        |
|----------------------|------|--------|------|--------|
| November             | 1.21 | 0.0044 | 1.01 | 0.8969 |
| December             | 1.09 | 0.2393 | .95  | 0.4780 |
| Visit type           |      |        |      |        |
| Return patient visit | Ref  |        | Ref  |        |
| New patient visit    | 0.84 | <.0001 | .88  | 0.0058 |



**eTable 8.** Regression Table for Conditional Logistic Clinic Appointment Time Model With Hourly Appointment Time Variables for Colorectal Cancer Screening

| Variable                   | Clinician Ordered Test |            | Patient Completed Test |            |
|----------------------------|------------------------|------------|------------------------|------------|
|                            | Odds Ratio             | P value    | Odds Ratio             | P value    |
| Appointment year           |                        |            |                        |            |
| 9/1/2014-8/31/2015         | Ref                    |            | Ref                    |            |
| 9/1/2015-8/31/2016         | 1.43                   | <.000<br>1 | 1.14                   | <.000<br>1 |
| Age at visit               | 0.96                   | <.000<br>1 | .98                    | <.000<br>1 |
| Gender                     |                        |            |                        |            |
| Male                       | Ref                    |            | Ref                    |            |
| Female                     | 0.83                   | <.000<br>1 | .87                    | <.000<br>1 |
| Race                       |                        |            |                        |            |
| White                      |                        |            |                        |            |
| Asian/East Indian          | 0.90                   | 0.198<br>4 | 1.00                   | 0.9903     |
| Black                      | 1.06                   | 0.167<br>4 | 1.06                   | 0.1728     |
| Hispanic                   | 0.93                   | 0.512<br>2 | .84                    | 0.1172     |
| Other                      | 0.93                   | 0.214<br>9 | .83                    | 0.0013     |
| Insurance                  |                        |            |                        |            |
| Private                    | Ref                    |            | Ref                    |            |
| Medicaid                   | 0.58                   | <.000<br>1 | .84                    | 0.0040     |
| Medicare                   | 0.67                   | <.000<br>1 | .91                    | 0.0258     |
| Charlson comorbidity index | 0.92                   | <.000<br>1 | .98                    | 0.0004     |
| Income                     |                        |            |                        |            |
| Less than \$50,000         | Ref                    |            | Ref                    |            |
| \$50,000 to \$100,000      | 1.04                   | 0.375<br>9 | 1.04                   | 0.4292     |
| Greater than \$100,000     | 1.14                   | 0.017<br>7 | 1.15                   | 0.0117     |
| Missing                    | 1.08                   | 0.575<br>3 | .74                    | 0.0266     |
| Practice site              |                        |            |                        |            |

|                                                                |      |        |      |        |
|----------------------------------------------------------------|------|--------|------|--------|
| Penn Internal Medicine - Michael Cirigliano Internal Medicine  | Ref  |        | Ref  |        |
| Penn Family Medicine Chestnut Hill                             | 1.00 | .      | 1.00 | .      |
| Delancey Medicine Associates                                   | 1.00 | .      | 1.00 | .      |
| Penn Family and Internal Medicine Lincoln                      | 1.00 | .      | 1.00 | .      |
| Penn Family Medicine Southern Chester County                   | 1.00 | .      | 1.00 | .      |
| Penn Internal Medicine University City                         | 0.84 | 0.6999 | .98  | 0.9575 |
| Penn General Internal Medicine Perelman                        | 1.00 | 1.0000 | 1.00 | .      |
| Penn Center for Primary Care, Penn Presbyterian Medical Center | 0.62 | 0.7521 | 1.01 | 0.9904 |
| Penn Radnor Internal Medicine                                  | 0.72 | 0.1744 | 1.17 | 0.4512 |
| Penn Radnor Internal Medicine Geriatrics                       | 1.00 | .      | 1.00 | .      |
| Penn Internal Medicine Media                                   | 1.00 | .      | 1.00 | .      |
| Penn Internal Medicine Mayfair                                 | 1.06 | 0.8697 | 1.00 | 0.9914 |
| Penn Internal Medicine - J. Edwin Wood Clinic                  | 1.00 | .      | 1.00 | .      |
| Penn Family Medicine Kennett                                   | 1.00 | .      | 1.00 | .      |
| Penn Family Care                                               | 1.00 | .      | 1.00 | .      |
| Penn Family and Internal Medicine Longwood                     | 1.00 | .      | 1.00 | .      |
| Penn Family Medicine New Garden                                | 1.00 | .      | 1.00 | .      |
| Penn Family Medicine Phoenixville                              | 1.00 | .      | 1.00 | .      |
| Penn Family Medicine Unionville                                | 0.18 | 0.0217 | 1.01 | 0.9794 |
| Penn Family and Internal Medicine Cherry Hill                  | 1.00 | .      | 1.00 | .      |
| Penn Presbyterian Internal Medicine                            | 1.00 | .      | 1.00 | .      |
| Penn Internal Medicine East Marshall Street                    | 1.00 | .      | 1.00 | .      |
| Penn Primary Care and Integrative Medicine Whiteland           | 1.00 | .      | 1.00 | .      |
| Penn Medicine Rittenhouse                                      | 1.00 | .      | 1.00 | .      |
| Penn Medicine Bala Cynwyd                                      | 1.00 | .      | 1.00 | .      |
| Penn Medicine Woodbury Heights                                 | 1.00 | .      | 1.00 | .      |
| Penn Family Medicine Valley Forge                              | 1.00 | .      | 1.00 | .      |
| Penn Medicine Bucks County                                     | 1.00 | .      | 1.00 | .      |
| Penn Family Medicine Limerick                                  | 1.00 | .      | 1.00 | .      |
| Penn Family Medicine Gibbsboro                                 | 1.00 | .      | 1.00 | .      |

|                                      |      |            |      |            |
|--------------------------------------|------|------------|------|------------|
| Penn Spruce Internal Medicine        | 1.00 | .          | 1.00 | .          |
| Penn Family Medicine University City | 1.00 | .          | 1.00 | .          |
| Penn Family Medicine West Chester    | 1.00 | .          | 1.00 | .          |
| Clinic appointment time              |      |            |      |            |
| 8AM                                  | Ref  |            | Ref  |            |
| 9AM                                  | 0.91 | 0.078<br>3 | .86  | 0.0023     |
| 10AM                                 | 0.78 | <.000<br>1 | .88  | 0.0071     |
| 11AM                                 | 0.64 | <.000<br>1 | .77  | <.000<br>1 |
| 12PM                                 | 0.56 | <.000<br>1 | .76  | 0.0017     |
| 1PM                                  | 0.68 | <.000<br>1 | .72  | <.000<br>1 |
| 2PM                                  | 0.64 | <.000<br>1 | .73  | <.000<br>1 |
| 3PM                                  | 0.66 | <.000<br>1 | .80  | <.000<br>1 |
| 4PM                                  | 0.50 | <.000<br>1 | .74  | <.000<br>1 |
| 5PM                                  | 0.54 | <.000<br>1 | .60  | <.000<br>1 |
| Month                                |      |            |      |            |
| September                            | Ref  |            | Ref  |            |
| January                              | 1.30 | <.000<br>1 | 1.24 | 0.0002     |
| February                             | 1.45 | <.000<br>1 | 1.21 | 0.0015     |
| March                                | 1.62 | <.000<br>1 | 1.12 | 0.0641     |
| April                                | 1.61 | <.000<br>1 | 1.18 | 0.0093     |
| May                                  | 1.48 | <.000<br>1 | 1.18 | 0.0098     |
| June                                 | 1.64 | <.000<br>1 | 1.23 | 0.0016     |
| July                                 | 1.49 | <.000<br>1 | 1.24 | 0.0010     |
| August                               | 1.80 | <.000<br>1 | 1.28 | 0.0002     |
| October                              | 1.13 | 0.023<br>0 | 1.03 | 0.5369     |
| November                             | 1.24 | 0.000<br>3 | 1.04 | 0.5390     |

|                      |      |            |      |        |
|----------------------|------|------------|------|--------|
| December             | 1.14 | 0.033<br>7 | 1.08 | 0.1865 |
| Visit type           |      |            |      |        |
| Return patient visit | Ref  |            | Ref  |        |
| New patient visit    | 1.01 | 0.875<br>4 | 1.00 | 0.9483 |

**eTable 9.** Regression Table for Conditional Logistic Clinic Appointment Time Model With Continuous Appointment Time Variables for Colorectal Cancer Screening

| Variable                                                      | Clinician Ordered Test |         | Patient Completed Test |         |
|---------------------------------------------------------------|------------------------|---------|------------------------|---------|
|                                                               | Odds Ratio             | P value | Odds Ratio             | P value |
| Appointment year                                              |                        |         |                        |         |
| 9/1/2014-8/31/2015                                            | Ref                    |         | Ref                    |         |
| 9/1/2015-8/31/2016                                            | 1.43                   | <.0001  | 1.14                   | <.0001  |
| Age at visit                                                  | .96                    | <.0001  | .98                    | <.0001  |
| Gender                                                        |                        |         |                        |         |
| Male                                                          | Ref                    |         | Ref                    |         |
| Female                                                        | .82                    | <.0001  | .87                    | <.0001  |
| Race                                                          |                        |         |                        |         |
| White                                                         | Ref                    |         | Ref                    |         |
| Asian/East Indian                                             | .90                    | 0.1992  | 1.00                   | 0.9864  |
| Black                                                         | 1.06                   | 0.1864  | 1.06                   | 0.1799  |
| Hispanic                                                      | .94                    | 0.6004  | .84                    | 0.1131  |
| Other                                                         | .93                    | 0.2316  | .83                    | 0.0013  |
| Insurance                                                     |                        |         |                        |         |
| Private                                                       | Ref                    |         | Ref                    |         |
| Medicaid                                                      | .57                    | <.0001  | .84                    | 0.0026  |
| Medicare                                                      | .67                    | <.0001  | .91                    | 0.0148  |
| Charlson comorbidity index                                    | .92                    | <.0001  | .98                    | 0.0004  |
| Income                                                        |                        |         |                        |         |
| Less than \$50,000                                            | Ref                    |         | Ref                    |         |
| \$50,000 to \$100,000                                         | 1.05                   | 0.3242  | 1.04                   | 0.3880  |
| Greater than \$100,000                                        | 1.15                   | 0.0132  | 1.15                   | 0.0108  |
| Missing                                                       | 1.09                   | 0.5362  | .74                    | 0.0234  |
| Practice site                                                 |                        |         |                        |         |
| Penn Internal Medicine - Michael Cirigliano Internal Medicine | Ref                    |         | Ref                    |         |
| Penn Family Medicine Chestnut Hill                            | 1.00                   | .       | 1.00                   | .       |
| Delancey Medicine Associates                                  | 1.00                   | .       | 1.00                   | .       |
| Penn Family and Internal Medicine Lincoln                     | 1.00                   | .       | 1.00                   | .       |
| Penn Family Medicine Southern Chester County                  | 1.00                   | .       | 1.00                   | .       |
| Penn Internal Medicine University City                        | .78                    | 0.5717  | .97                    | 0.9478  |
| Penn General Internal Medicine Perelman                       | 1.00                   | .       | 1.00                   | .       |

|                                                                |      |        |      |        |
|----------------------------------------------------------------|------|--------|------|--------|
| Penn Center for Primary Care, Penn Presbyterian Medical Center | .59  | 0.7188 | 1.01 | 0.9913 |
| Penn Radnor Internal Medicine                                  | .78  | 0.2929 | 1.18 | 0.4134 |
| Penn Radnor Internal Medicine Geriatrics                       | 1.00 | .      | 1.00 | .      |
| Penn Internal Medicine Media                                   | 1.00 | .      | 1.00 | .      |
| Penn Internal Medicine Mayfair                                 | 1.10 | 0.7914 | 1.00 | 0.9956 |
| Penn Internal Medicine - J. Edwin Wood Clinic                  | 1.00 | .      | 1.00 | .      |
| Penn Family Medicine Kennett                                   | 1.00 | .      | 1.00 | .      |
| Penn Family Care                                               | 1.00 | .      | 1.00 | .      |
| Penn Family and Internal Medicine Longwood                     | 1.00 | .      | 1.00 | .      |
| Penn Family Medicine New Garden                                | 1.00 | .      | 1.00 | .      |
| Penn Family Medicine Phoenixville                              | 1.00 | .      | 1.00 | .      |
| Penn Family Medicine Unionville                                | .16  | 0.0193 | 1.01 | 0.9870 |
| Penn Family and Internal Medicine Cherry Hill                  | 1.00 | .      | 1.00 | .      |
| Penn Presbyterian Internal Medicine                            | 1.00 | .      | 1.00 | .      |
| Penn Internal Medicine East Marshall Street                    | 1.00 | .      | 1.00 | .      |
| Penn Primary Care and Integrative Medicine Whiteland           | 1.00 | .      | 1.00 | .      |
| Penn Medicine Rittenhouse                                      | 1.00 | .      | 1.00 | .      |
| Penn Medicine Bala Cynwyd                                      | 1.00 | .      | 1.00 | .      |
| Penn Medicine Woodbury Heights                                 | 1.00 | .      | 1.00 | .      |
| Penn Family Medicine Valley Forge                              | 1.00 | .      | 1.00 | .      |
| Penn Medicine Bucks County                                     | 1.00 | .      | 1.00 | .      |
| Penn Family Medicine Limerick                                  | 1.00 | .      | 1.00 | .      |
| Penn Family Medicine Gibbsboro                                 | 1.00 | .      | 1.00 | .      |
| Penn Spruce Internal Medicine                                  | 1.00 | .      | 1.00 | .      |
| Penn Family Medicine University City                           | 1.00 | .      | 1.00 | .      |
| Penn Family Medicine West Chester                              | 1.00 | .      | 1.00 | .      |
| Appointment hour                                               | .94  | <.0001 | .97  | <.0001 |
| Month                                                          |      |        |      |        |
| September                                                      | Ref  |        | Ref  |        |
| January                                                        | 1.30 | <.0001 | 1.25 | 0.0002 |
| February                                                       | 1.47 | <.0001 | 1.21 | 0.0012 |
| March                                                          | 1.63 | <.0001 | 1.13 | 0.0535 |
| April                                                          | 1.63 | <.0001 | 1.18 | 0.0069 |
| May                                                            | 1.49 | <.0001 | 1.19 | 0.0080 |
| June                                                           | 1.65 | <.0001 | 1.23 | 0.0013 |
| July                                                           | 1.50 | <.0001 | 1.25 | 0.0008 |

|                      |      |        |      |        |
|----------------------|------|--------|------|--------|
| August               | 1.82 | <.0001 | 1.29 | 0.0001 |
| October              | 1.14 | 0.0159 | 1.04 | 0.4669 |
| November             | 1.25 | 0.0002 | 1.04 | 0.4900 |
| December             | 1.15 | 0.0186 | 1.09 | 0.1548 |
| Visit type           |      |        |      |        |
| Return patient visit | Ref  |        | Ref  |        |
| New patient visit    | 1.00 | 0.8880 | .99  | 0.8510 |

**eTable 10.** Regression Table for Generalized Estimated Equations Model Clustered on Primary Care Physician With Hourly Appointment Time Variables for Breast Cancer Screening

| Variable                                                       | Clinician Ordered Test |         | Patient Completed Test |         |
|----------------------------------------------------------------|------------------------|---------|------------------------|---------|
|                                                                | Odds Ratio             | P value | Odds Ratio             | P value |
| Appointment year                                               |                        |         |                        |         |
| 9/1/2014-8/31/2015                                             | Ref                    |         | Ref                    |         |
| 9/1/2015-8/31/2016                                             | 1.11                   | 0.0328  | 1.01                   | 0.7597  |
| Age at visit                                                   | 1.00                   | 0.2600  | 1.01                   | 0.0005  |
| Race                                                           |                        |         |                        |         |
| White                                                          | Ref                    |         | Ref                    |         |
| Asian/East Indian                                              | 1.27                   | 0.0110  | 1.34                   | 0.0066  |
| Black                                                          | 1.31                   | <.0001  | 1.22                   | <.0001  |
| Hispanic                                                       | 1.73                   | <.0001  | 1.72                   | 0.0001  |
| Other                                                          | .94                    | 0.3805  | .99                    | 0.8856  |
| Insurance                                                      |                        |         |                        |         |
| Private                                                        | Ref                    |         | Ref                    |         |
| Medicaid                                                       | .61                    | <.0001  | .77                    | 0.0003  |
| Medicare                                                       | .75                    | <.0001  | .84                    | 0.0008  |
| Charlson comorbidity index                                     | .89                    | <.0001  | .93                    | <.0001  |
| Income                                                         |                        |         |                        |         |
| Less than \$50,000                                             | Ref                    |         | Ref                    |         |
| \$50,000 to \$100,000                                          | .98                    | 0.7065  | 1.02                   | 0.7396  |
| Greater than \$100,000                                         | .93                    | 0.2410  | 1.07                   | 0.2740  |
| Missing                                                        | .60                    | 0.0003  | .76                    | 0.1096  |
| Practice site                                                  |                        |         |                        |         |
| Penn Internal Medicine - Michael Cirigliano Internal Medicine  | Ref                    |         | Ref                    |         |
| Penn Family Medicine Chestnut Hill                             | .44                    | 0.0819  | .32                    | 0.0019  |
| Delancey Medicine Associates                                   | .82                    | 0.3831  | .35                    | <.0001  |
| Penn Family and Internal Medicine Lincoln                      | .39                    | 0.1143  | .40                    | 0.0284  |
| Penn Family Medicine Southern Chester County                   | .07                    | <.0001  | .06                    | <.0001  |
| Penn Internal Medicine University City                         | .76                    | 0.1909  | .58                    | 0.0001  |
| Penn General Internal Medicine Perelman                        | .41                    | <.0001  | .19                    | <.0001  |
| Penn Center for Primary Care, Penn Presbyterian Medical Center | .54                    | 0.0014  | .37                    | <.0001  |



|                                                      |      |        |     |        |
|------------------------------------------------------|------|--------|-----|--------|
| Penn Radnor Internal Medicine                        | .53  | <.0001 | .44 | <.0001 |
| Penn Radnor Internal Medicine Geriatrics             | .65  | <.0001 | .46 | <.0001 |
| Penn Internal Medicine Media                         | .19  | <.0001 | .13 | <.0001 |
| Penn Internal Medicine Mayfair                       | .51  | 0.0257 | .39 | 0.0010 |
| Penn Internal Medicine - J. Edwin Wood Clinic        | .56  | 0.0048 | .32 | <.0001 |
| Penn Family Medicine Kennett                         | .61  | 0.0711 | .45 | 0.0007 |
| Penn Family Care                                     | .36  | <.0001 | .29 | <.0001 |
| Penn Family and Internal Medicine Longwood           | .33  | <.0001 | .27 | <.0001 |
| Penn Family Medicine New Garden                      | .09  | <.0001 | .10 | <.0001 |
| Penn Family Medicine Phoenixville                    | .86  | 0.5275 | .19 | <.0001 |
| Penn Family Medicine Unionville                      | .23  | 0.0084 | .24 | 0.0003 |
| Penn Family and Internal Medicine Cherry Hill        | .29  | <.0001 | .09 | <.0001 |
| Penn Presbyterian Internal Medicine                  | .71  | 0.3205 | .39 | <.0001 |
| Penn Internal Medicine East Marshall Street          | .40  | <.0001 | .34 | <.0001 |
| Penn Primary Care and Integrative Medicine Whiteland | .36  | 0.0091 | .20 | <.0001 |
| Penn Medicine Rittenhouse                            | .61  | 0.0303 | .40 | <.0001 |
| Penn Medicine Bala Cynwyd                            | .48  | 0.0056 | .30 | <.0001 |
| Penn Medicine Woodbury Heights                       | .18  | <.0001 | .12 | <.0001 |
| Penn Family Medicine Valley Forge                    | .42  | <.0001 | .36 | <.0001 |
| Penn Medicine Bucks County                           | .41  | <.0001 | .33 | <.0001 |
| Penn Family Medicine Limerick                        | .21  | <.0001 | .17 | <.0001 |
| Penn Family Medicine Gibbsboro                       | .33  | <.0001 | .17 | <.0001 |
| Penn Spruce Internal Medicine                        | .94  | 0.7795 | .41 | <.0001 |
| Penn Family Medicine University City                 | .43  | <.0001 | .27 | <.0001 |
| Penn Family Medicine West Chester                    | 1.08 | 0.4956 | .58 | <.0001 |
| Appointment hour                                     |      |        |     |        |
| 8AM                                                  | Ref  |        | Ref |        |
| 9AM                                                  | .90  | 0.0692 | .91 | 0.1296 |
| 10AM                                                 | .74  | <.0001 | .79 | 0.0005 |
| 11AM                                                 | .56  | <.0001 | .63 | <.0001 |
| 12PM                                                 | .65  | 0.0003 | .65 | 0.0001 |
| 1PM                                                  | .65  | <.0001 | .71 | <.0001 |
| 2PM                                                  | .66  | <.0001 | .70 | <.0001 |
| 3PM                                                  | .66  | <.0001 | .74 | <.0001 |
| 4PM                                                  | .51  | <.0001 | .58 | <.0001 |
| 5PM                                                  | .54  | <.0001 | .48 | <.0001 |

|                      |      |        |      |        |
|----------------------|------|--------|------|--------|
| Month                |      |        |      |        |
| September            | Ref  |        | Ref  |        |
| January              | 1.20 | 0.0123 | 1.04 | 0.5682 |
| February             | 1.31 | 0.0003 | 1.01 | 0.8555 |
| March                | 1.44 | <.0001 | 1.10 | 0.2358 |
| April                | 1.27 | 0.0033 | .94  | 0.4824 |
| May                  | 1.35 | 0.0002 | .94  | 0.4685 |
| June                 | 1.29 | 0.0023 | 1.06 | 0.5228 |
| July                 | 1.23 | 0.0158 | .87  | 0.1193 |
| August               | 1.24 | 0.0158 | 1.09 | 0.3266 |
| October              | 1.19 | 0.0026 | 1.19 | 0.0021 |
| November             | 1.21 | 0.0033 | 1.02 | 0.8027 |
| December             | 1.11 | 0.1456 | .96  | 0.5918 |
| Visit type           |      |        |      |        |
| Return patient visit | Ref  |        | Ref  |        |
| New patient visit    | .79  | 0.0001 | .83  | 0.0003 |
| Intercept            | 3.43 | <.0001 | 1.17 | 0.4860 |

**eTable 11.** Regression Table for Generalized Estimated Equations Model Clustered on Primary Care Physician With Continuous Appointment Time Variables for Breast Cancer Screening

| Variable                                                       | Clinician Ordered Test |         | Patient Completed Test |         |
|----------------------------------------------------------------|------------------------|---------|------------------------|---------|
|                                                                | Odds Ratio             | P value | Odds Ratio             | P value |
| Appointment year                                               |                        |         |                        |         |
| 9/1/2014-8/31/2015                                             | Ref                    |         | Ref                    |         |
| 9/1/2015-8/31/2016                                             | 1.11                   | 0.0307  | 1.02                   | 0.7403  |
| Age at visit                                                   | 1.00                   | 0.2812  | 1.01                   | 0.0006  |
| Race                                                           |                        |         |                        |         |
| White                                                          | Ref                    |         | Ref                    |         |
| Asian/East Indian                                              | 1.28                   | 0.0086  | 1.34                   | 0.0057  |
| Black                                                          | 1.30                   | <.0001  | 1.22                   | <.0001  |
| Hispanic                                                       | 1.75                   | <.0001  | 1.74                   | 0.0001  |
| Other                                                          | .94                    | 0.3779  | .99                    | 0.8909  |
| Insurance                                                      |                        |         |                        |         |
| Private                                                        | Ref                    |         | Ref                    |         |
| Medicaid                                                       | .60                    | <.0001  | .77                    | 0.0002  |
| Medicare                                                       | .74                    | <.0001  | .84                    | 0.0004  |
| Charlson comorbidity index                                     | .89                    | <.0001  | .93                    | <.0001  |
| Income                                                         |                        |         |                        |         |
| Less than \$50,000                                             | Ref                    |         | Ref                    |         |
| \$50,000 to \$100,000                                          | .98                    | 0.6318  | 1.01                   | 0.7849  |
| Greater than \$100,000                                         | .93                    | 0.2194  | 1.07                   | 0.2900  |
| Missing                                                        | .61                    | 0.0004  | .77                    | 0.1232  |
| Practice site                                                  |                        |         |                        |         |
| Penn Internal Medicine - Michael Cirigliano Internal Medicine  | Ref                    |         | Ref                    |         |
| Penn Family Medicine Chestnut Hill                             | .45                    | 0.0908  | .33                    | 0.0024  |
| Delancey Medicine Associates                                   | .83                    | 0.4046  | .35                    | <.0001  |
| Penn Family and Internal Medicine Lincoln                      | .41                    | 0.1338  | .42                    | 0.0353  |
| Penn Family Medicine Southern Chester County                   | .07                    | <.0001  | .06                    | <.0001  |
| Penn Internal Medicine University City                         | .78                    | 0.2349  | .59                    | 0.0004  |
| Penn General Internal Medicine Perelman                        | .42                    | <.0001  | .19                    | <.0001  |
| Penn Center for Primary Care, Penn Presbyterian Medical Center | .55                    | 0.0017  | .38                    | <.0001  |
| Penn Radnor Internal Medicine                                  | .52                    | <.0001  | .44                    | <.0001  |
| Penn Radnor Internal Medicine Geriatrics                       | .64                    | <.0001  | .45                    | <.0001  |

|                                                      |      |        |      |        |
|------------------------------------------------------|------|--------|------|--------|
| Penn Internal Medicine Media                         | .19  | <.0001 | .13  | <.0001 |
| Penn Internal Medicine Mayfair                       | .51  | 0.0303 | .39  | 0.0011 |
| Penn Internal Medicine - J. Edwin Wood Clinic        | .59  | 0.0077 | .33  | <.0001 |
| Penn Family Medicine Kennett                         | .61  | 0.0760 | .46  | 0.0009 |
| Penn Family Care                                     | .38  | <.0001 | .30  | <.0001 |
| Penn Family and Internal Medicine Longwood           | .34  | <.0001 | .28  | <.0001 |
| Penn Family Medicine New Garden                      | .10  | <.0001 | .10  | <.0001 |
| Penn Family Medicine Phoenixville                    | .88  | 0.5886 | .19  | <.0001 |
| Penn Family Medicine Unionville                      | .23  | 0.0101 | .25  | 0.0004 |
| Penn Family and Internal Medicine Cherry Hill        | .30  | <.0001 | .09  | <.0001 |
| Penn Presbyterian Internal Medicine                  | .72  | 0.3248 | .39  | <.0001 |
| Penn Internal Medicine East Marshall Street          | .42  | <.0001 | .35  | <.0001 |
| Penn Primary Care and Integrative Medicine Whiteland | .36  | 0.0103 | .20  | <.0001 |
| Penn Medicine Rittenhouse                            | .60  | 0.0269 | .39  | <.0001 |
| Penn Medicine Bala Cynwyd                            | .49  | 0.0084 | .31  | <.0001 |
| Penn Medicine Woodbury Heights                       | .19  | <.0001 | .12  | <.0001 |
| Penn Family Medicine Valley Forge                    | .43  | <.0001 | .36  | <.0001 |
| Penn Medicine Bucks County                           | .41  | <.0001 | .33  | <.0001 |
| Penn Family Medicine Limerick                        | .22  | <.0001 | .17  | <.0001 |
| Penn Family Medicine Gibbsboro                       | .32  | <.0001 | .17  | <.0001 |
| Penn Spruce Internal Medicine                        | .97  | 0.9055 | .42  | <.0001 |
| Penn Family Medicine University City                 | .45  | <.0001 | .28  | <.0001 |
| Penn Family Medicine West Chester                    | 1.14 | 0.2439 | .60  | <.0001 |
| Appointment hour                                     | .94  | <.0001 | .95  | <.0001 |
| Month                                                |      |        |      |        |
| September                                            | Ref  |        | Ref  |        |
| January                                              | 1.21 | 0.0098 | 1.05 | 0.5374 |
| February                                             | 1.31 | 0.0003 | 1.02 | 0.8219 |
| March                                                | 1.44 | <.0001 | 1.10 | 0.2364 |
| April                                                | 1.28 | 0.0024 | .95  | 0.5160 |
| May                                                  | 1.36 | 0.0001 | .95  | 0.5124 |
| June                                                 | 1.30 | 0.0017 | 1.06 | 0.4718 |
| July                                                 | 1.24 | 0.0116 | .87  | 0.1301 |
| August                                               | 1.24 | 0.0125 | 1.09 | 0.3073 |
| October                                              | 1.20 | 0.0017 | 1.19 | 0.0016 |
| November                                             | 1.22 | 0.0024 | 1.02 | 0.7549 |
| December                                             | 1.11 | 0.1286 | .96  | 0.6470 |

|                      |      |        |      |        |
|----------------------|------|--------|------|--------|
| Visit type           |      |        |      |        |
| Return patient visit | Ref  |        | Ref  |        |
| New patient visit    | .80  | 0.0002 | .83  | 0.0003 |
| Intercept            | 3.19 | <.0001 | 1.12 | 0.5800 |

**eTable 12.** Regression Table for Generalized Estimated Equations Model Clustered Around Primary Care Physician With Hourly Appointment Time Variables for Colorectal Cancer Screening

| Variable                                                      | Clinician Ordered Test |                | Patient Completed Test |                |
|---------------------------------------------------------------|------------------------|----------------|------------------------|----------------|
|                                                               | Odds Ratio             | <i>P</i> value | Odds Ratio             | <i>P</i> value |
| Appointment year                                              |                        |                |                        |                |
| 9/1/2014-8/31/2015                                            | Ref                    |                | Ref                    |                |
| 9/1/2015-8/31/2016                                            | 1.36                   | <.0001         | 1.12                   | 0.0005         |
| Age at visit                                                  | .97                    | <.0001         | .98                    | <.0001         |
| Gender                                                        |                        |                |                        |                |
| Male                                                          | Ref                    |                | Ref                    |                |
| Female                                                        | .96                    | 0.4245         | .94                    | 0.0308         |
| Race                                                          |                        |                |                        |                |
| White                                                         | Ref                    |                | Ref                    |                |
| Asian/East Indian                                             | 1.02                   | 0.8383         | 1.02                   | 0.7635         |
| Black                                                         | 1.08                   | 0.1123         | 1.07                   | 0.1435         |
| Hispanic                                                      | 1.04                   | 0.7010         | .86                    | 0.1557         |
| Other                                                         | .97                    | 0.5444         | .83                    | 0.0009         |
| Insurance                                                     |                        |                |                        |                |
| Private                                                       | Ref                    |                | Ref                    |                |
| Medicaid                                                      | .57                    | <.0001         | .78                    | 0.0003         |
| Medicare                                                      | .67                    | <.0001         | .89                    | 0.0037         |
| Charlson comorbidity index                                    | .92                    | <.0001         | .98                    | 0.0005         |
| Income                                                        |                        |                |                        |                |
| Less than \$50,000                                            | Ref                    |                | Ref                    |                |
| \$50,000 to \$100,000                                         | 1.05                   | 0.2528         | 1.08                   | 0.1083         |
| Greater than \$100,000                                        | 1.15                   | 0.0206         | 1.20                   | 0.0037         |
| Missing                                                       | 1.00                   | 0.9784         | .75                    | 0.0456         |
| Practice site                                                 |                        |                |                        |                |
| Penn Internal Medicine - Michael Cirigliano Internal Medicine | Ref                    |                | Ref                    |                |
| Penn Family Medicine Chestnut Hill                            | .15                    | <.0001         | .32                    | <.0001         |
| Delancey Medicine Associates                                  | .52                    | <.0001         | .41                    | <.0001         |
| Penn Family and Internal Medicine Lincoln                     | .01                    | <.0001         | .27                    | <.0001         |
| Penn Family Medicine Southern Chester County                  | .03                    | <.0001         | .20                    | <.0001         |
| Penn Internal Medicine University City                        | .56                    | <.0001         | .63                    | <.0001         |
| Penn General Internal Medicine Perelman                       | 24.04                  | <.0001         | .68                    | <.0001         |

|                                                                |      |        |     |        |
|----------------------------------------------------------------|------|--------|-----|--------|
| Penn Center for Primary Care, Penn Presbyterian Medical Center | .40  | <.0001 | .56 | <.0001 |
| Penn Radnor Internal Medicine                                  | .79  | 0.1811 | .66 | <.0001 |
| Penn Radnor Internal Medicine Geriatrics                       | 1.75 | <.0001 | .57 | <.0001 |
| Penn Internal Medicine Media                                   | .22  | <.0001 | .36 | <.0001 |
| Penn Internal Medicine Mayfair                                 | .19  | <.0001 | .48 | 0.0016 |
| Penn Internal Medicine - J. Edwin Wood Clinic                  | .21  | <.0001 | .32 | <.0001 |
| Penn Family Medicine Kennett                                   | .13  | 0.0010 | .37 | <.0001 |
| Penn Family Care                                               | .31  | <.0001 | .51 | <.0001 |
| Penn Family and Internal Medicine Longwood                     | .19  | <.0001 | .41 | 0.0299 |
| Penn Family Medicine New Garden                                | .07  | <.0001 | .25 | <.0001 |
| Penn Family Medicine Phoenixville                              | .31  | 0.0010 | .24 | <.0001 |
| Penn Family Medicine Unionville                                | .08  | 0.0166 | .23 | <.0001 |
| Penn Family and Internal Medicine Cherry Hill                  | .13  | <.0001 | .32 | <.0001 |
| Penn Presbyterian Internal Medicine                            | .54  | 0.0129 | .55 | 0.0004 |
| Penn Internal Medicine East Marshall Street                    | .07  | <.0001 | .27 | <.0001 |
| Penn Primary Care and Integrative Medicine Whiteland           | .21  | 0.0219 | .44 | <.0001 |
| Penn Medicine Rittenhouse                                      | .06  | <.0001 | .35 | <.0001 |
| Penn Medicine Bala Cynwyd                                      | .24  | <.0001 | .35 | <.0001 |
| Penn Medicine Woodbury Heights                                 | .05  | <.0001 | .18 | <.0001 |
| Penn Family Medicine Valley Forge                              | .30  | <.0001 | .51 | <.0001 |
| Penn Medicine Bucks County                                     | .21  | <.0001 | .22 | <.0001 |
| Penn Family Medicine Limerick                                  | .16  | <.0001 | .20 | <.0001 |
| Penn Family Medicine Gibbsboro                                 | .01  | <.0001 | .21 | <.0001 |
| Penn Spruce Internal Medicine                                  | .42  | <.0001 | .46 | <.0001 |
| Penn Family Medicine University City                           | .35  | <.0001 | .41 | <.0001 |
| Penn Family Medicine West Chester                              | .12  | 0.0064 | .38 | <.0001 |
| Appointment hour                                               |      |        |     |        |
| 8AM                                                            | Ref  |        | Ref |        |
| 9AM                                                            | .98  | 0.7029 | .89 | 0.0166 |
| 10AM                                                           | .84  | 0.0008 | .89 | 0.0108 |
| 11AM                                                           | .70  | <.0001 | .79 | <.0001 |
| 12PM                                                           | .67  | <.0001 | .82 | 0.0396 |
| 1PM                                                            | .73  | <.0001 | .75 | <.0001 |
| 2PM                                                            | .68  | <.0001 | .76 | <.0001 |
| 3PM                                                            | .69  | <.0001 | .83 | 0.0008 |
| 4PM                                                            | .53  | <.0001 | .76 | <.0001 |

|                      |       |        |      |        |
|----------------------|-------|--------|------|--------|
| 5PM                  | .60   | <.0001 | .62  | <.0001 |
| Month                |       |        |      |        |
| September            | Ref   |        | Ref  |        |
| January              | 1.35  | <.0001 | 1.30 | <.0001 |
| February             | 1.41  | <.0001 | 1.22 | 0.0010 |
| March                | 1.53  | <.0001 | 1.12 | 0.0621 |
| April                | 1.58  | <.0001 | 1.17 | 0.0086 |
| May                  | 1.43  | <.0001 | 1.19 | 0.0169 |
| June                 | 1.55  | <.0001 | 1.20 | 0.0020 |
| July                 | 1.41  | <.0001 | 1.26 | <.0001 |
| August               | 1.68  | <.0001 | 1.26 | 0.0008 |
| October              | 1.16  | 0.0033 | 1.04 | 0.4169 |
| November             | 1.26  | 0.0003 | 1.04 | 0.4561 |
| December             | 1.17  | 0.0254 | 1.10 | 0.1291 |
| Visit type           |       |        |      |        |
| Return patient visit | Ref   |        | Ref  |        |
| New patient visit    | 1.01  | 0.8058 | .95  | 0.1667 |
| Intercept            | 15.44 | <.0001 | 2.58 | <.0001 |



**eTable 13.** Regression Table for Generalized Estimated Equations Model Clustered Around Primary Care Physician With Continuous Appointment Time Variables for Colorectal Cancer Screening

| Variable                                                      | Clinician Ordered Test |         | Patient Completed Test |         |
|---------------------------------------------------------------|------------------------|---------|------------------------|---------|
|                                                               | Odds Ratio             | P value | Odds Ratio             | P value |
| Appointment year                                              |                        |         |                        |         |
| 9/1/2014-8/31/2015                                            | Ref                    |         | Ref                    |         |
| 9/1/2015-8/31/2016                                            | 1.36                   | <.0001  | 1.12                   | 0.0006  |
| Age at visit                                                  | .97                    | <.0001  | .98                    | <.0001  |
| Gender                                                        |                        |         |                        |         |
| Male                                                          | Ref                    |         | Ref                    |         |
| Female                                                        | .96                    | 0.3923  | .93                    | 0.0235  |
| Race                                                          |                        |         |                        |         |
| White                                                         | Ref                    |         | Ref                    |         |
| Asian/East Indian                                             | 1.02                   | 0.7858  | 1.02                   | 0.7499  |
| Black                                                         | 1.08                   | 0.1226  | 1.07                   | 0.1468  |
| Hispanic                                                      | 1.04                   | 0.6844  | .86                    | 0.1526  |
| Other                                                         | .97                    | 0.5430  | .83                    | 0.0009  |
| Insurance                                                     |                        |         |                        |         |
| Private                                                       | Ref                    |         | Ref                    |         |
| Medicaid                                                      | .57                    | <.0001  | .78                    | 0.0002  |
| Medicare                                                      | .67                    | <.0001  | .89                    | 0.0022  |
| Charlson comorbidity index                                    | .92                    | <.0001  | .98                    | 0.0004  |
| Income                                                        |                        |         |                        |         |
| Less than \$50,000                                            | Ref                    |         | Ref                    |         |
| \$50,000 to \$100,000                                         | 1.05                   | 0.2552  | 1.08                   | 0.0982  |
| Greater than \$100,000                                        | 1.14                   | 0.0217  | 1.21                   | 0.0034  |
| Missing                                                       | 1.01                   | 0.9559  | .75                    | 0.0457  |
| Practice site                                                 |                        |         |                        |         |
| Penn Internal Medicine - Michael Cirigliano Internal Medicine | Ref                    |         | Ref                    |         |
| Penn Family Medicine Chestnut Hill                            | .16                    | <.0001  | .32                    | <.0001  |
| Delancey Medicine Associates                                  | .52                    | <.0001  | .41                    | <.0001  |
| Penn Family and Internal Medicine Lincoln                     | .01                    | <.0001  | .27                    | <.0001  |
| Penn Family Medicine Southern Chester County                  | .03                    | <.0001  | .20                    | <.0001  |
| Penn Internal Medicine University City                        | .57                    | <.0001  | .63                    | <.0001  |

|                                                                |       |        |      |        |
|----------------------------------------------------------------|-------|--------|------|--------|
| Penn General Internal Medicine Perelman                        | 23.95 | <.0001 | .68  | <.0001 |
| Penn Center for Primary Care, Penn Presbyterian Medical Center | .41   | <.0001 | .56  | <.0001 |
| Penn Radnor Internal Medicine                                  | .79   | 0.1966 | .66  | <.0001 |
| Penn Radnor Internal Medicine Geriatrics                       | 1.74  | <.0001 | .56  | <.0001 |
| Penn Internal Medicine Media                                   | .22   | <.0001 | .36  | <.0001 |
| Penn Internal Medicine Mayfair                                 | .19   | <.0001 | .47  | 0.0013 |
| Penn Internal Medicine - J. Edwin Wood Clinic                  | .21   | <.0001 | .32  | <.0001 |
| Penn Family Medicine Kennett                                   | .13   | 0.0010 | .37  | <.0001 |
| Penn Family Care                                               | .32   | <.0001 | .52  | <.0001 |
| Penn Family and Internal Medicine Longwood                     | .20   | <.0001 | .41  | 0.0302 |
| Penn Family Medicine New Garden                                | .07   | <.0001 | .25  | <.0001 |
| Penn Family Medicine Phoenixville                              | .31   | 0.0012 | .24  | <.0001 |
| Penn Family Medicine Unionville                                | .08   | 0.0175 | .23  | <.0001 |
| Penn Family and Internal Medicine Cherry Hill                  | .14   | <.0001 | .32  | <.0001 |
| Penn Presbyterian Internal Medicine                            | .54   | 0.0153 | .55  | 0.0003 |
| Penn Internal Medicine East Marshall Street                    | .07   | <.0001 | .27  | <.0001 |
| Penn Primary Care and Integrative Medicine Whiteland           | .21   | 0.0225 | .43  | <.0001 |
| Penn Medicine Rittenhouse                                      | .06   | <.0001 | .35  | <.0001 |
| Penn Medicine Bala Cynwyd                                      | .24   | <.0001 | .35  | <.0001 |
| Penn Medicine Woodbury Heights                                 | .05   | <.0001 | .18  | <.0001 |
| Penn Family Medicine Valley Forge                              | .30   | <.0001 | .51  | <.0001 |
| Penn Medicine Bucks County                                     | .21   | <.0001 | .22  | <.0001 |
| Penn Family Medicine Limerick                                  | .16   | <.0001 | .20  | <.0001 |
| Penn Family Medicine Gibbsboro                                 | .01   | <.0001 | .21  | <.0001 |
| Penn Spruce Internal Medicine                                  | .43   | <.0001 | .47  | <.0001 |
| Penn Family Medicine University City                           | .36   | <.0001 | .41  | <.0001 |
| Penn Family Medicine West Chester                              | .13   | 0.0073 | .39  | <.0001 |
| Appointment hour                                               | .94   | <.0001 | .97  | <.0001 |
| Month                                                          |       |        |      |        |
| September                                                      | Ref   |        | Ref  |        |
| January                                                        | 1.35  | <.0001 | 1.30 | <.0001 |
| February                                                       | 1.42  | <.0001 | 1.22 | 0.0011 |
| March                                                          | 1.53  | <.0001 | 1.12 | 0.0613 |
| April                                                          | 1.59  | <.0001 | 1.17 | 0.0080 |

|                      |       |        |      |        |
|----------------------|-------|--------|------|--------|
| May                  | 1.43  | <.0001 | 1.19 | 0.0170 |
| June                 | 1.55  | <.0001 | 1.20 | 0.0021 |
| July                 | 1.42  | <.0001 | 1.26 | <.0001 |
| August               | 1.69  | <.0001 | 1.26 | 0.0007 |
| October              | 1.17  | 0.0027 | 1.04 | 0.4119 |
| November             | 1.26  | 0.0002 | 1.04 | 0.4555 |
| December             | 1.17  | 0.0227 | 1.10 | 0.1294 |
| Visit type           |       |        |      |        |
| Return patient visit | Ref   |        | Ref  |        |
| New patient visit    | 1.02  | 0.7525 | .95  | 0.1481 |
| Intercept            | 15.94 | <.0001 | 2.53 | <.0001 |

**eFigure 1.** Exclusions for the Patient Sample in Breast Cancer Screening

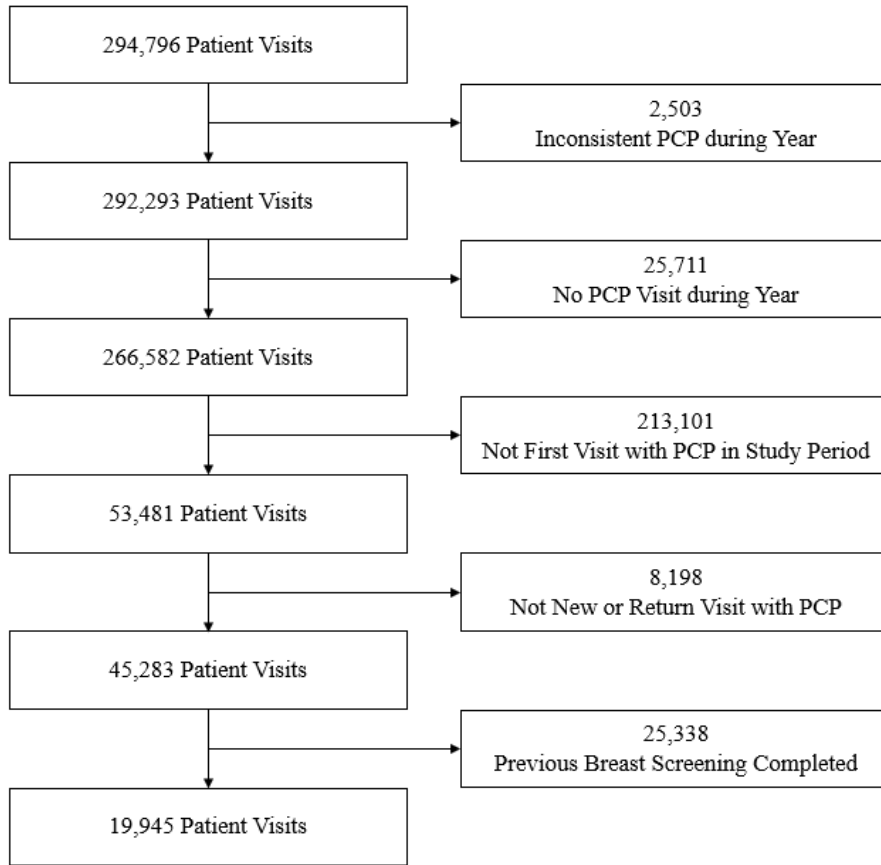

**eFigure 2.** Exclusions for the Patient Sample in Colorectal Cancer Screening

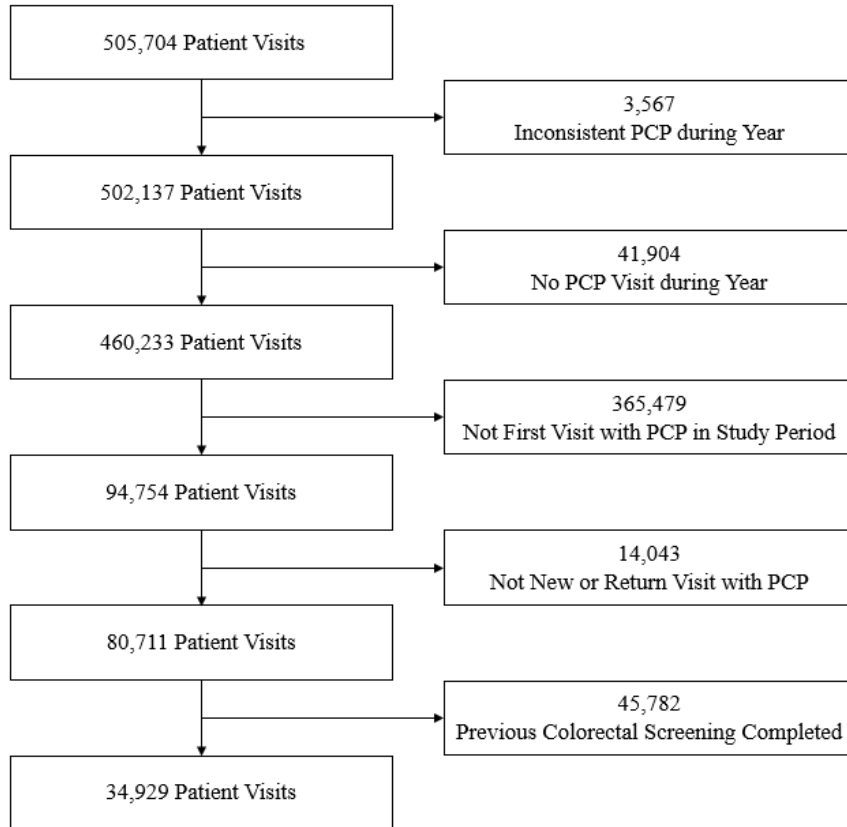

Supplement: jamanetwopen-2-e193403-s001.pdf [file jamanetwopen-2-e193403-s001.pdf]
